# Supplementary material
Source: PubMed Central journal article supplement (PMC6296472)

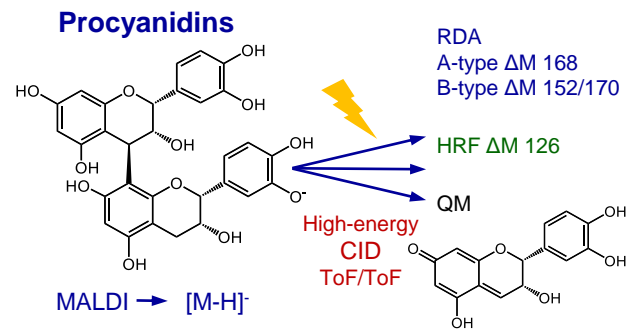

Supplement: NIHMS999758-supplement-Table_of_Contents_Graphic.pdf [file NIHMS999758-supplement-Table_of_Contents_Graphic.pdf]
